# Supplementary material for: Presence and relevance of serum anti-C1P IgG antibodies in relapsing-remitting multiple sclerosis
Source: Research Square preprint supplement (doi:10.21203/rs.3.rs-7825469/v1), 2025-11-05
Supplement: Supplementary file 1 [file c097261e785384c05f797e36.docx]

**Supplemental Material**

**Presence and relevance of serum anti-C1P antibodies in relapsing-remitting multiple sclerosis**

Justyna Chojdak-Lukasiewicz1,#, Anna Jakubiak-Augustyn2,#, Zdzislaw M. Szulc3, Jerzy Gubernator2, Anna Pokryszko-Dragan1, Slawomir Budrewicz1, Maria Podbielska3,4,*

From: 1Department of NeurosurgeryandNeurology, Wroclaw Medical University, Borowska 213, 50-556 Wroclaw, Poland;

2Department of Lipids and Liposomes, University of Wroclaw, F. Joliot-Curie 14a,
50-383 Wroclaw, Poland;

3Department of Biochemistry & Molecular Biology, Medical University of South Carolina,
173 Ashley Avenue, Charleston, SC 29425-2503, USA;

4Laboratory of Microbiome Immunobiology, Ludwik Hirszfeld Institute of Immunology & Experimental Therapy, Polish Academy of Sciences, Rudolfa Weigla 12, 53-114 Wroclaw, Poland

**Running title:** Anti-C1P antibodies in MS

#These authors contributed equally to this study

*To whom correspondence should be addressed: Maria Podbielska, Ludwik Hirszfeld Institute of Immunology & Experimental Therapy, Polish Academy of Sciences, Laboratory of Microbiome Immunobiology, Rudolfa Weigla 12, 53-114, Wroclaw, Poland; Tel: +48-71-370-99-12, Fax: +48-71-337-21-71, E-mail: [maria.podbielska@hirszfeld.pl](mailto:maria.podbielska@hirszfeld.pl)

**Keywords:** biomarkers,ceramide, C1P, lipid antigens, multiple sclerosis, sphingolipids.

| **Fraction no.** | **Specification** | **Preparation stage** | **Fraction volume**  **(ml)** | **Proteins present** | **Protein concentration ± SEM**  **(mg/ml)** | **Mean yield ± SEM * (%)** |
| --- | --- | --- | --- | --- | --- | --- |
| Fr. 0 | Load | Before affinity | 1 | Albumin, globulins | 38.8 ± 0.8 | − |
| Fr. 1 | Flow-through | After affinity | 4 | Albumin, globulins without IgG | 8.4 ± 0.2 | 86.6 ± 3.1 |
| Fr. 2 | Wash | After affinity | 12 | Albumin, globulins  without IgG | 0.08 ± 0.1 | 2.5 ± 0.3 |
| Fr. 3 | Elution | After affinity and ultrafiltration | 0.25 | IgG1, IgG2, IgG3, IgG4 | 22.3 ± 3.7 | 14.3 ± 2.4 |

**Supplemental Table S1.** Analysis of fractions obtained during IgG antibodies preparation from 0.5 ml of serum. * calculated as the percentage of total protein content of sample before purification.


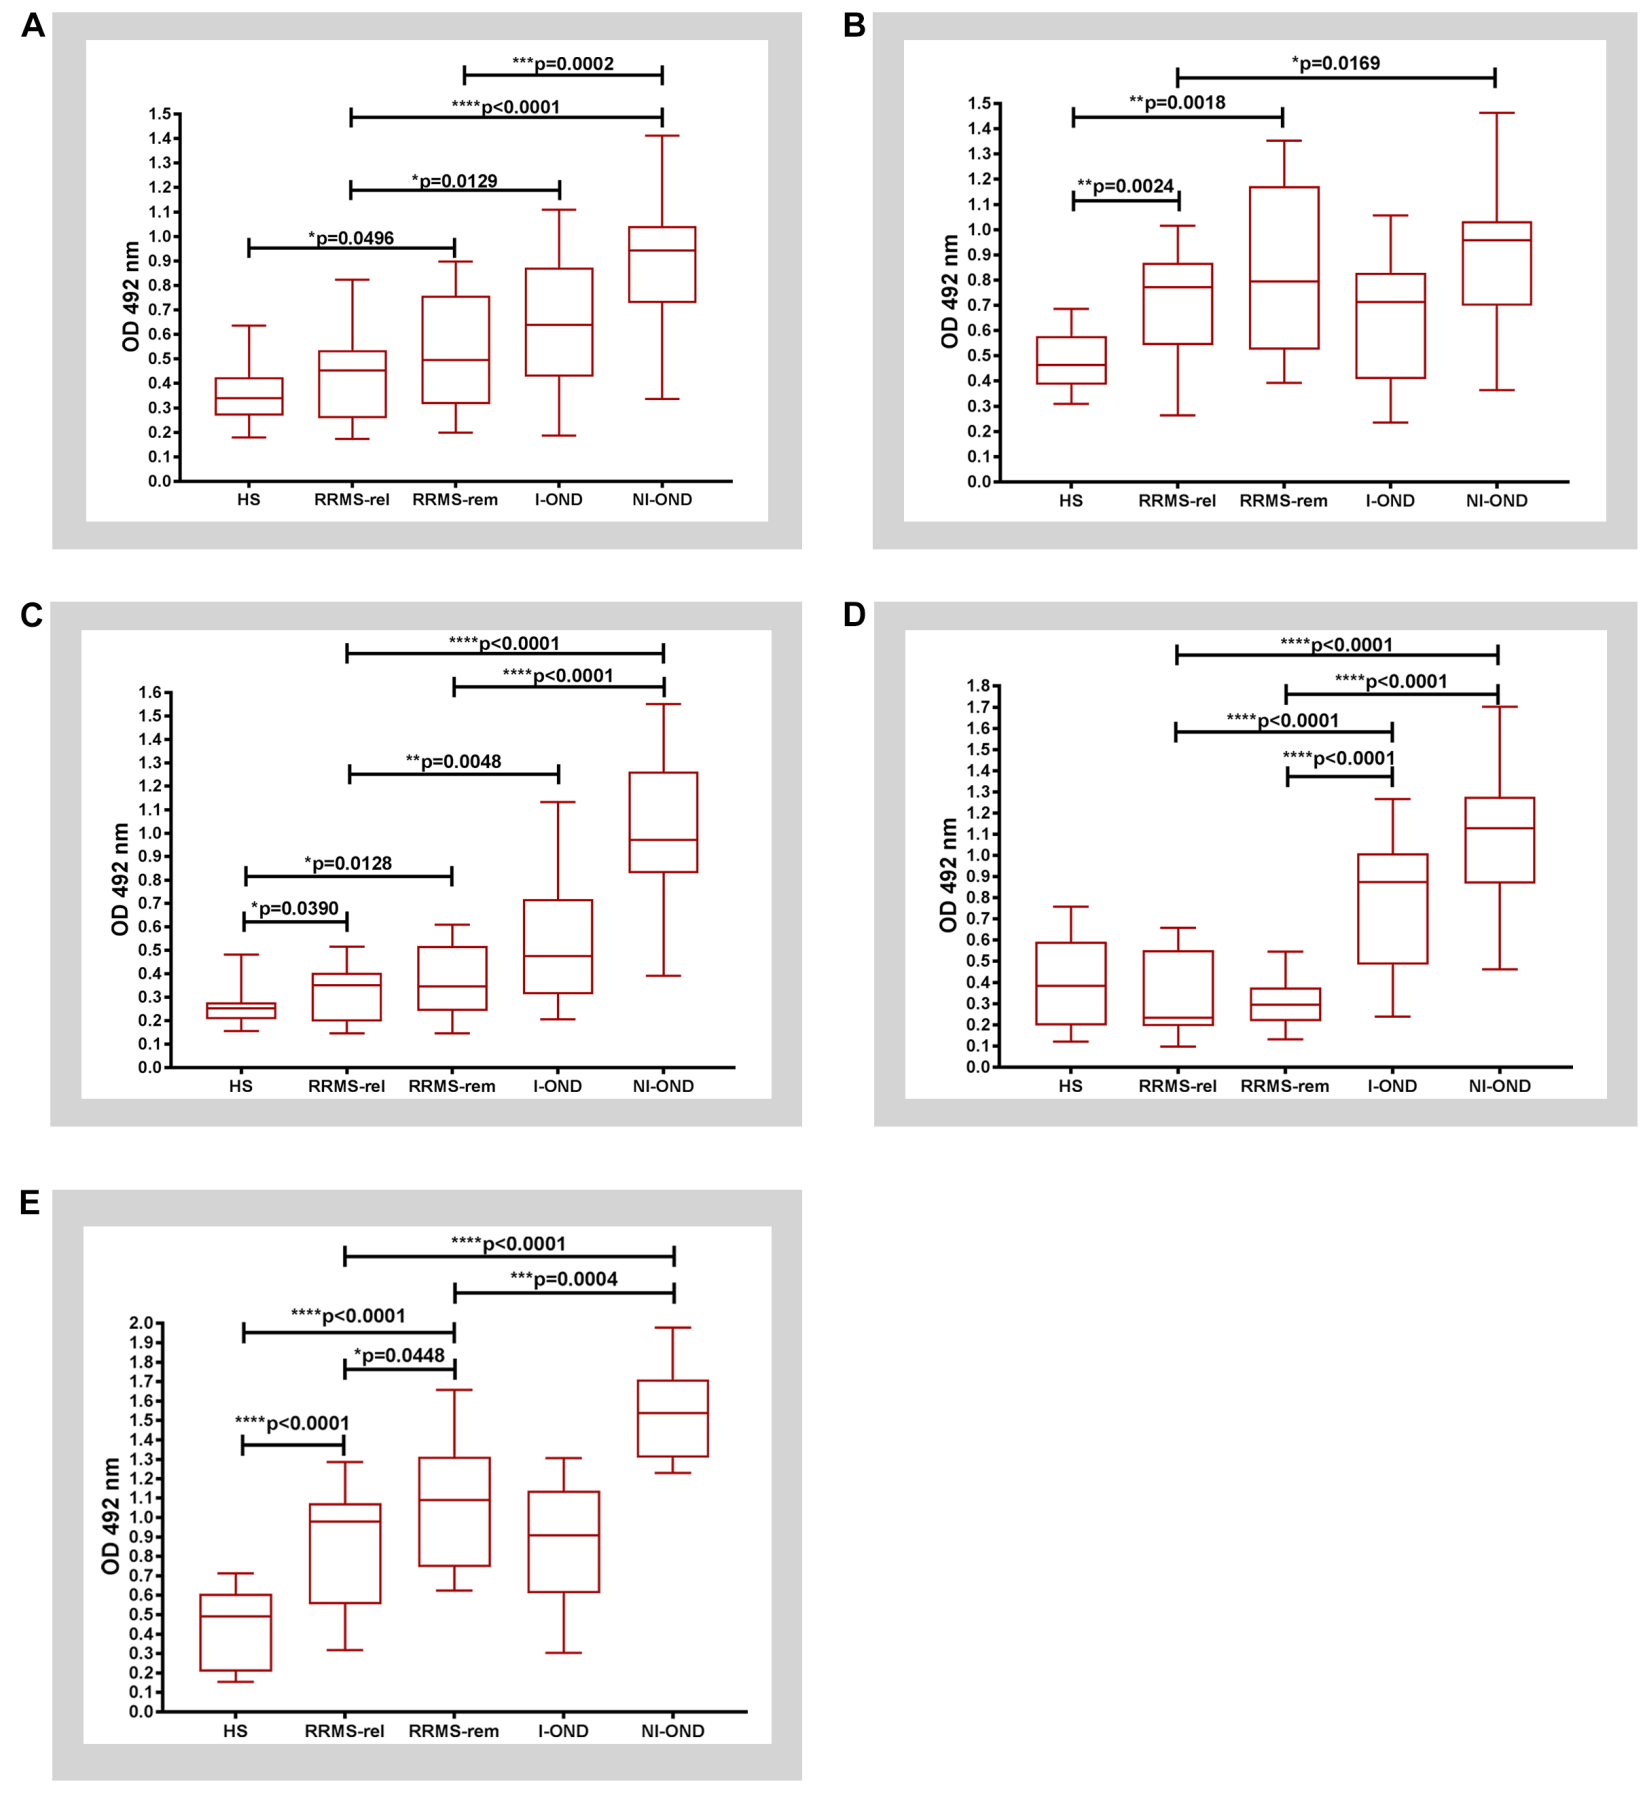


**Supplemental Fig. S1.** Reactivity of IgGs purified from human serum against: **A**) C16:0-C1P, **B**) C18:0- C1P, **C)** C18:1- C1P, **D**) C24:0- C1P and **E**) C24:1- C1P by ELISA test. All boxes represent the 25th–75th percentile while horizontal lines inside of the boxes point out the median (50th percentile). Whiskers extend from the boxes indicate the range of the data - minimum and maximum values, accordingly. Differences between groups of nonparametric data were determined by the Mann Whitney test using GrapPad Prism 7.01. HS (n=12), RRMS-rel (n=23), RRMS-rem (n=16), I-OND (n=13), NI-OND (n=13). Abbreviations: HS- healthy subjects; I-OND- inflammatory other neurological diseases; NI-OND- non-inflammatory other neurological diseases; rel- relapse; rem- remission; RRMS- relapsing-remitting multiple sclerosis.

| **Serum IgG** | **Group** | | | | |
| --- | --- | --- | --- | --- | --- |
| **RRMS-rel**  **N=23** | **RRMS-rem**  **N=16** | **I-OND**  **N=13** | **NI-OND**  **N=13** | **HS**  **N=12** |
| **MEAN ± SD** | **MEAN ± SD** | **MEAN ± SD** | **MEAN ± SD** | **MEAN ± SD** |
| Anti-C16:0-C1P | 0.4391 ± 0.1849  p=0.0129a  p<0.0001b | 0.5253 ± 0.2386  p=0.0002b  p=0.0496c | 0.653 ± 0.28 | 0.9145 ± 0.2757 | 0.3534 ± 0.1224 |
| Anti-C18:0-C1P | 0.7011 ± 0.226  p=0.0024c | 0.8232 ± 0.3282  p=0.0169b  p=0.0018c | 0.6457 ± 0.251 | 0.9121 ± 0.2829 | 0.4853 ± 0.1202 |
| Anti-C18:1-C1P | 0.3264 ± 0.1111  p=0.0048a  p<0.0001b  p=0.0390c | 0.3785 ± 0.1493  P<0.0001b  p=0.0128c | 0.5278 ± 0.2594 | 1.022 ± 0.2998 | 0.2555 ± 0.08237 |
| Anti-C24:0-C1P | 0.3278 ± 0.1865  p<0.0001a  p<0.0001b | 0.3067 ± 0.108  p<0.0001a  p<0.0001b | 0.7883 ± 0.3106 | 1.091 ± 0.319 | 0.3878 ± 0.2019 |
| Anti-C24:1-C1P | 0.869 ± 0.2784  p<0.0001a  p<0.0001c  p=0.0448d | 1.073 ± 0.321  p=0.0004b  p<0.0001c | 0.8688 ± 0.314 | 1.533 ± 0.2428 | 0.4265 ± 0.2061 |

**Supplemental Table S2.** The levels of reactivity of selected anti-C1P serum IgG in two subgroups of RRMS patients: relapse (RRMS-rel) and remission (RRMS-rem). Significant differences compared to reference groups were indicated as follows: a- inflammatory other neurological diseases (I-OND), b- non-inflammatory other neurological diseases (NI-OND), c-healthy subjects (HS). Difference between RRMS-rel and RRMS-rem was also examined and marked as d.

.


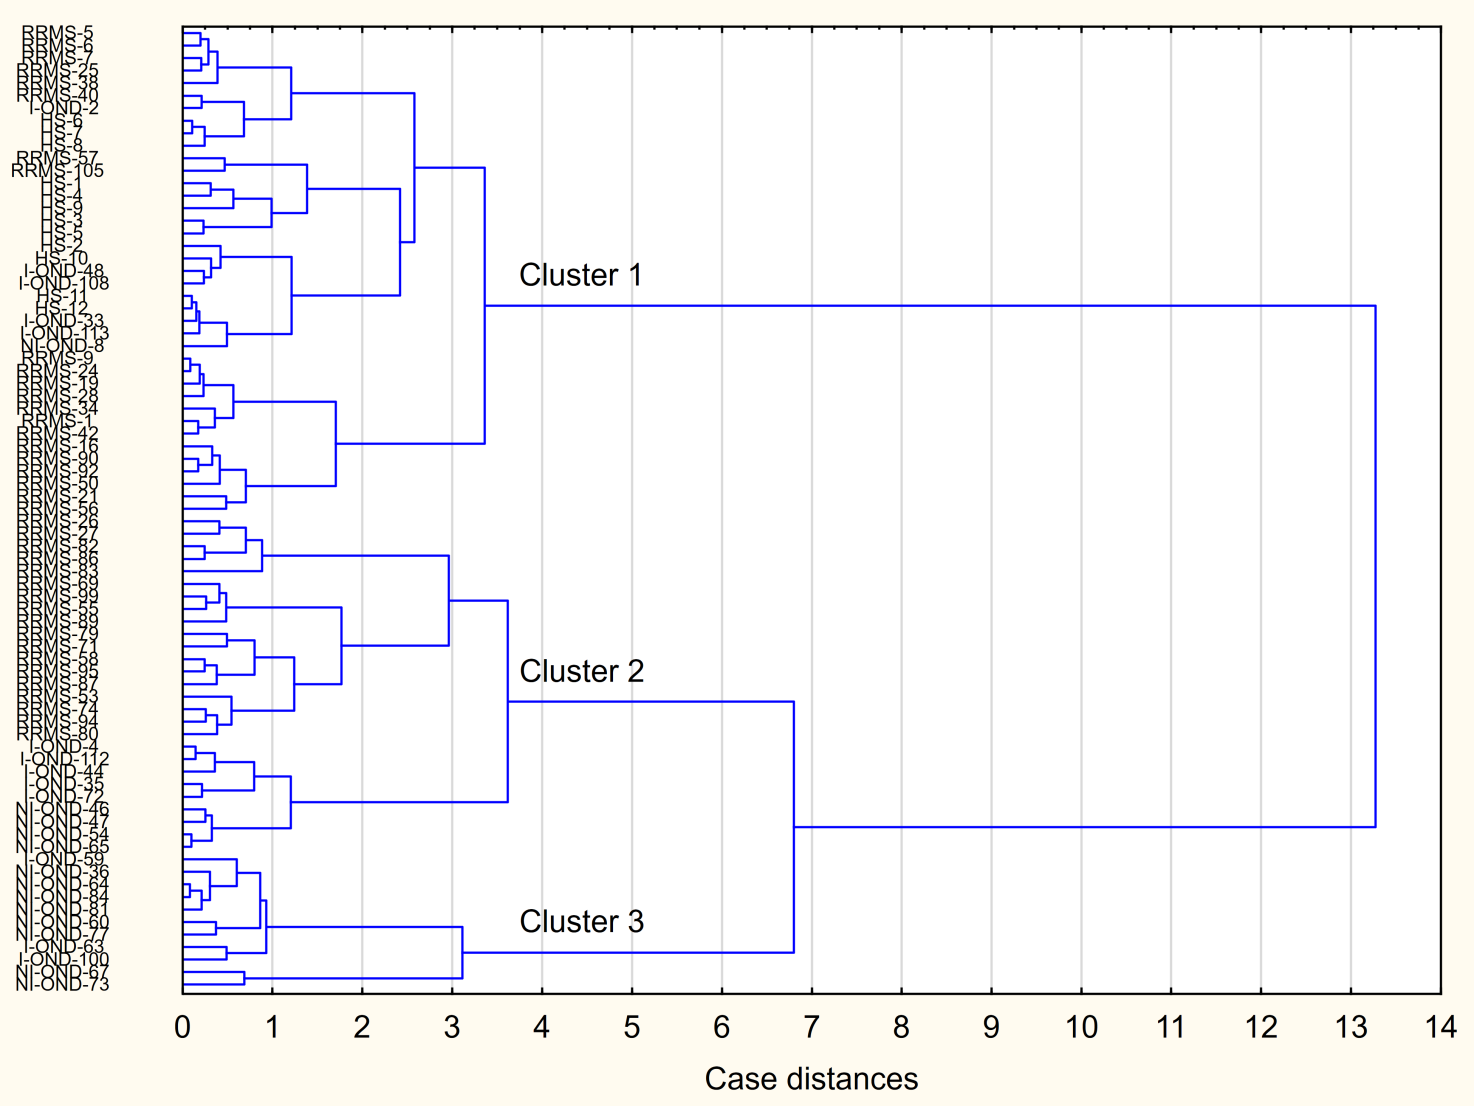


| **Group**  **Cluster No.** | **RRMS**  (n=39) | **HS**  (n=12) | **OND**  (n=26) |
| --- | --- | --- | --- |
| The number of samples  (percentage participation in whole group) | | |
| 3 (n=11) | 0 RRMS (0%) | 0 HS (0%) | 11 OND (42.3%):  8 NI-OND (30.8%) and  3 I-OND (11.5%) |
| 2 (n=27) | 18 RRMS (46.2%):  10 RRMS-rel (25.6%) and  8 RRMS-rem (20.5%) | 0 HS (0%) | 9 OND (34.6%):  4 NI-OND (15.4%) and  5 I-OND (19.2%) |
| 1 (n=39) | 21 RRMS (53.8%):  13 RRMS-rel (33.3%) and   8 RRMS-rem (20.5%) | 12 HS (100%) | 6 OND (23.1%):  1 NI-OND (3.8%) and  5 I-OND (19.2%) |

**Supplemental Fig. 2S.** Dendrogram of cluster analysis of serum IgG samples. The cluster analysis was performed for parameters which simultaneously complied the following criteria: they allowed for the differentiation of study groups and they had moderate or high clinical utility in the ROC curve analysis (AUC≥0.769). Each serum sample is represented by a vector of four parameters: anti-C16:0-C1P, anti-C18:0-C1P, anti-C24:0-C1P and anti-C24:1-C1P.


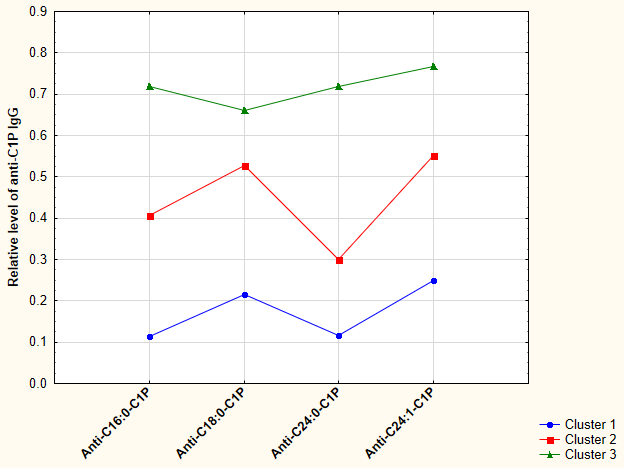


| **Group**  **Cluster No.** | **RRMS**  (n=39) | **HS**  (n=12) | **OND**  (n=26) |
| --- | --- | --- | --- |
| The number of samples  (percentage participation in each group) | | |
| 3 (n=11) | 0 RRMS (0%) | 0 HS (0%) | 11 OND (42.3%):  8 NI-OND (30.8%) and  3 I-OND (11.5%) |
| 2 (n=32) | 23 RRMS (59%):  14 RRMS-rel (35,9%) and  9 RRMS-rem (23.1%)) | 0 HS (0%) | 9 OND (34.6%):  4 NI-OND (15.4%) and  5 I-OND (19.2%) |
| 1 (n=34) | 16 RRMS (41.0%):  9 RRMS-rel (23.1%) and  7 RRMS-rem (17.9%) | 12 HS (100%) | 6 OND (23.1%):  1 NI-OND (3.8%) and  5 I-OND (19.2%) |

**Supplemental Fig. 3S.** K-means clustering of serum IgG samples from RRMS, HS and OND groups. Four parameters: anti-C16:0-C1P, anti-C18:0-C1P, anti-C24:0-C1P and anti-C24:1-C1P IgG levels were taken for the analysis.

**
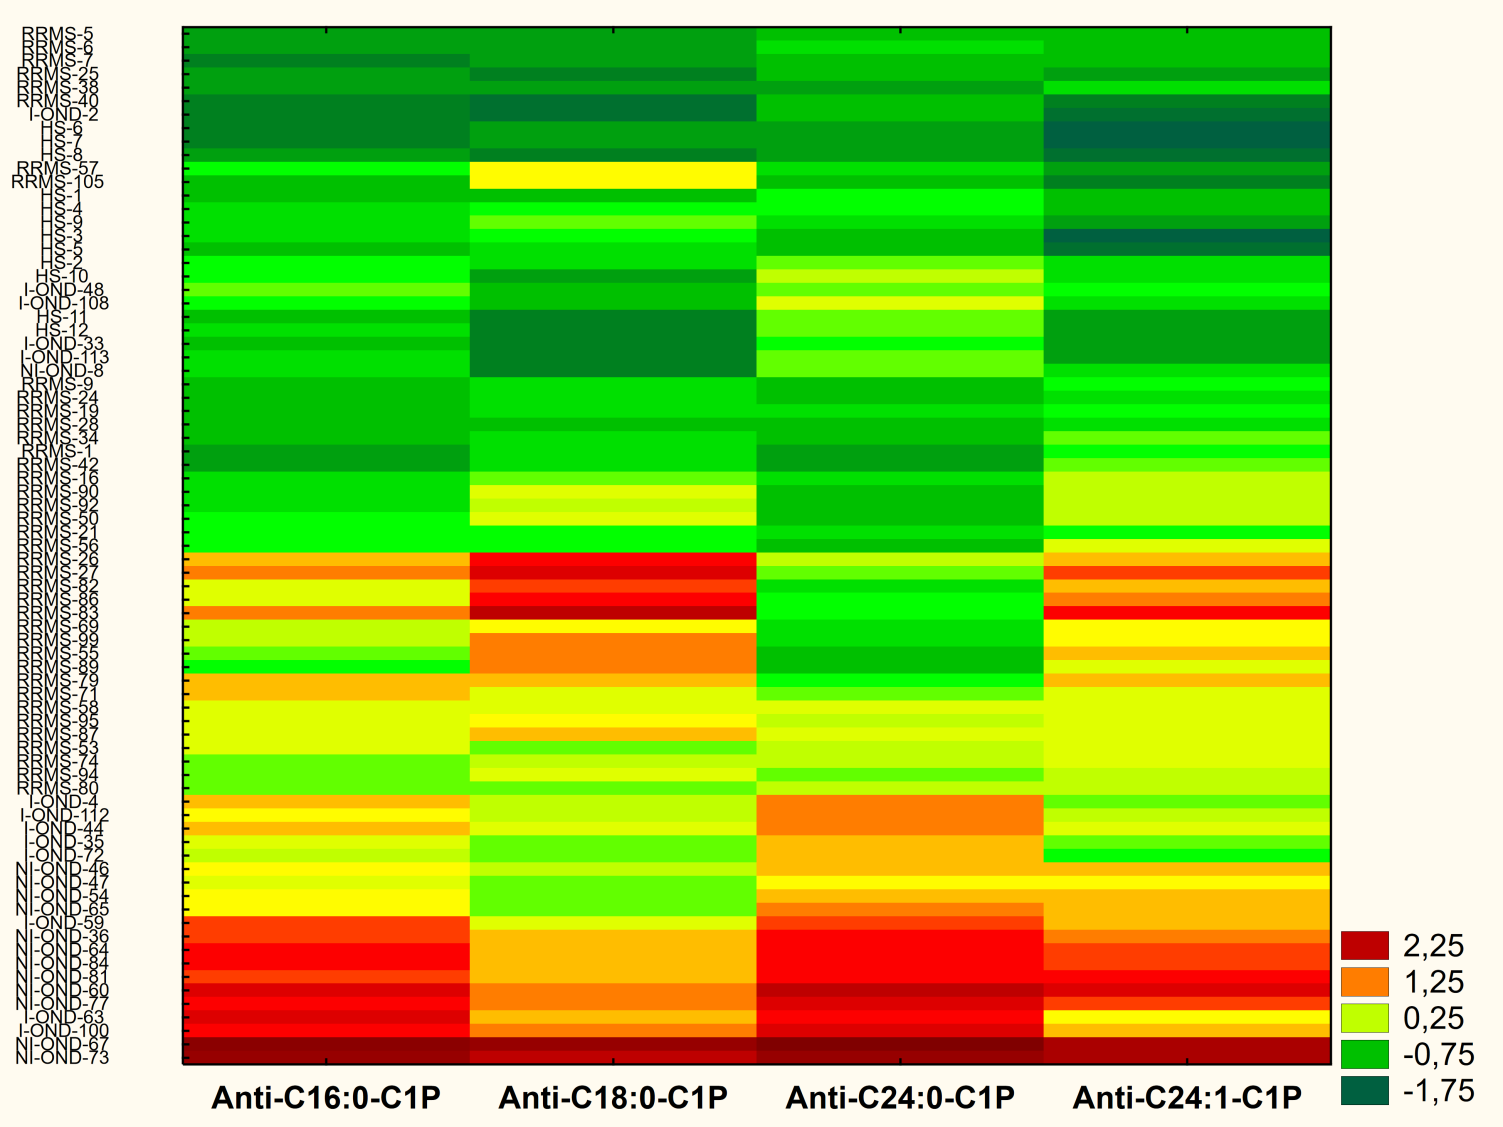
**

**Supplemental Fig. 4S.** Heat map showing distribution of selected anti-C1P IgG levels in the subjects examined.


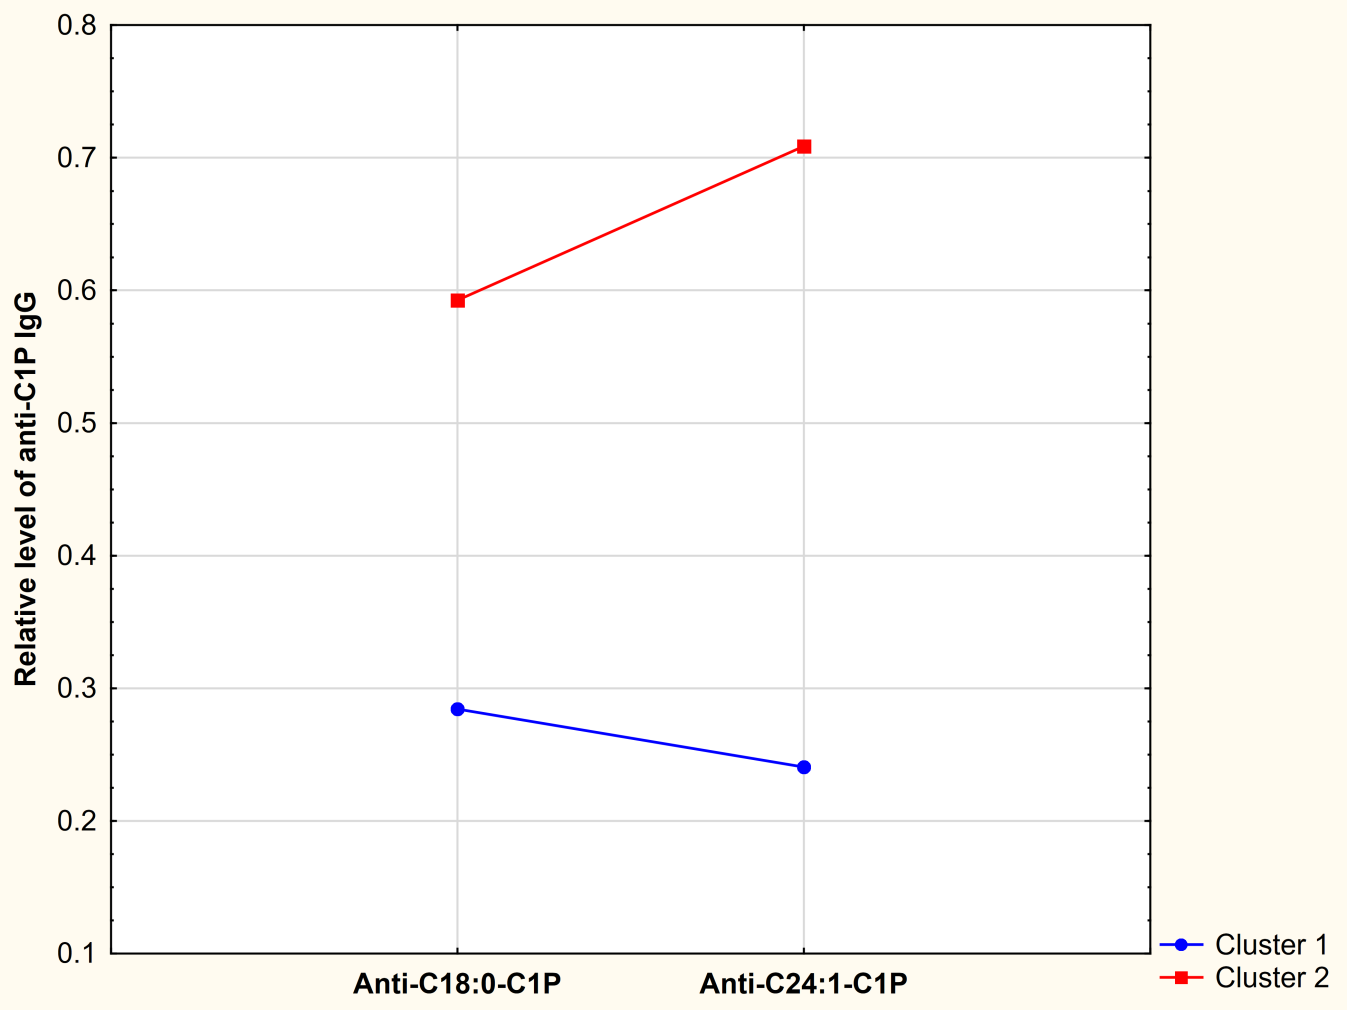


| **Group**  **Cluster No.** | **RRMS**  (n=39) | **HS**  (n=12) |
| --- | --- | --- |
| The number of samples  (percentage participation in whole group) | |
| 2 (n=23) | 23 RRMS (59.0%):  14 RRMS-rel (35.9%) and  9 RRMS-rem (23.1%) | 0 HS (0%) |
| 1 (n=28) | 16 RRMS (41.0%):  9 RRMS-rel (23.1%) and  7 RRMS-rem (17.9%) | 12 HS (100%) |

**Supplemental Fig. 5S.** K-means clustering of serum IgG samples from RRMS and HS groups. Two parameters: anti-C18:0-C1P and anti-C24:1-C1P IgG levels were taken for the analysis.


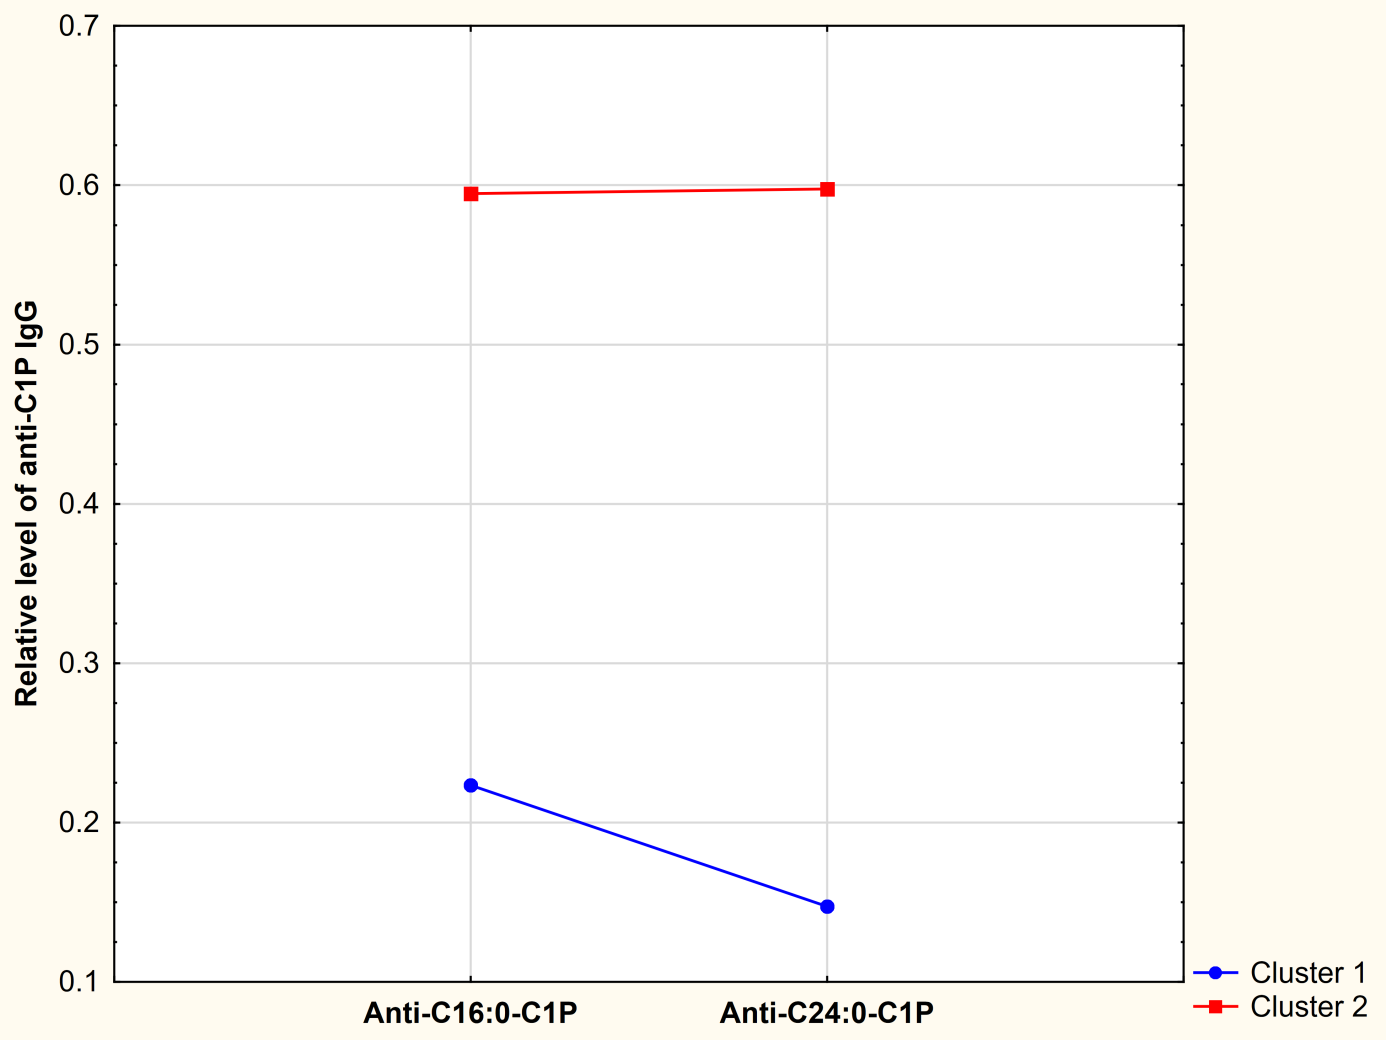


| **Group**  **Cluster No.** | **RRMS**  (n=39) | **OND**  (n=26) |
| --- | --- | --- |
| The number of samples  (percentage participation in whole group) | |
| 2 (n=20) | 0 RRMS (0%) | 20 OND (76.9%):  12 NI-OND (46.1%) and  8 I-OND (30.8%) |
| 1 (n=45) | 39 RRMS (100%):  23 RRMS-rel (59%) and  16 RRMS-rem (41%) | 6 OND (23.1%):  1 NI-OND (3.8%) and  5 I-OND (19.2%) |

**Supplemental Fig. 6S.** K-means clustering of serum IgG samples from RRMS and OND groups. Two parameters: anti-C16:0-C1P and anti-C24:0-C1P IgG levels were taken for the analysis.


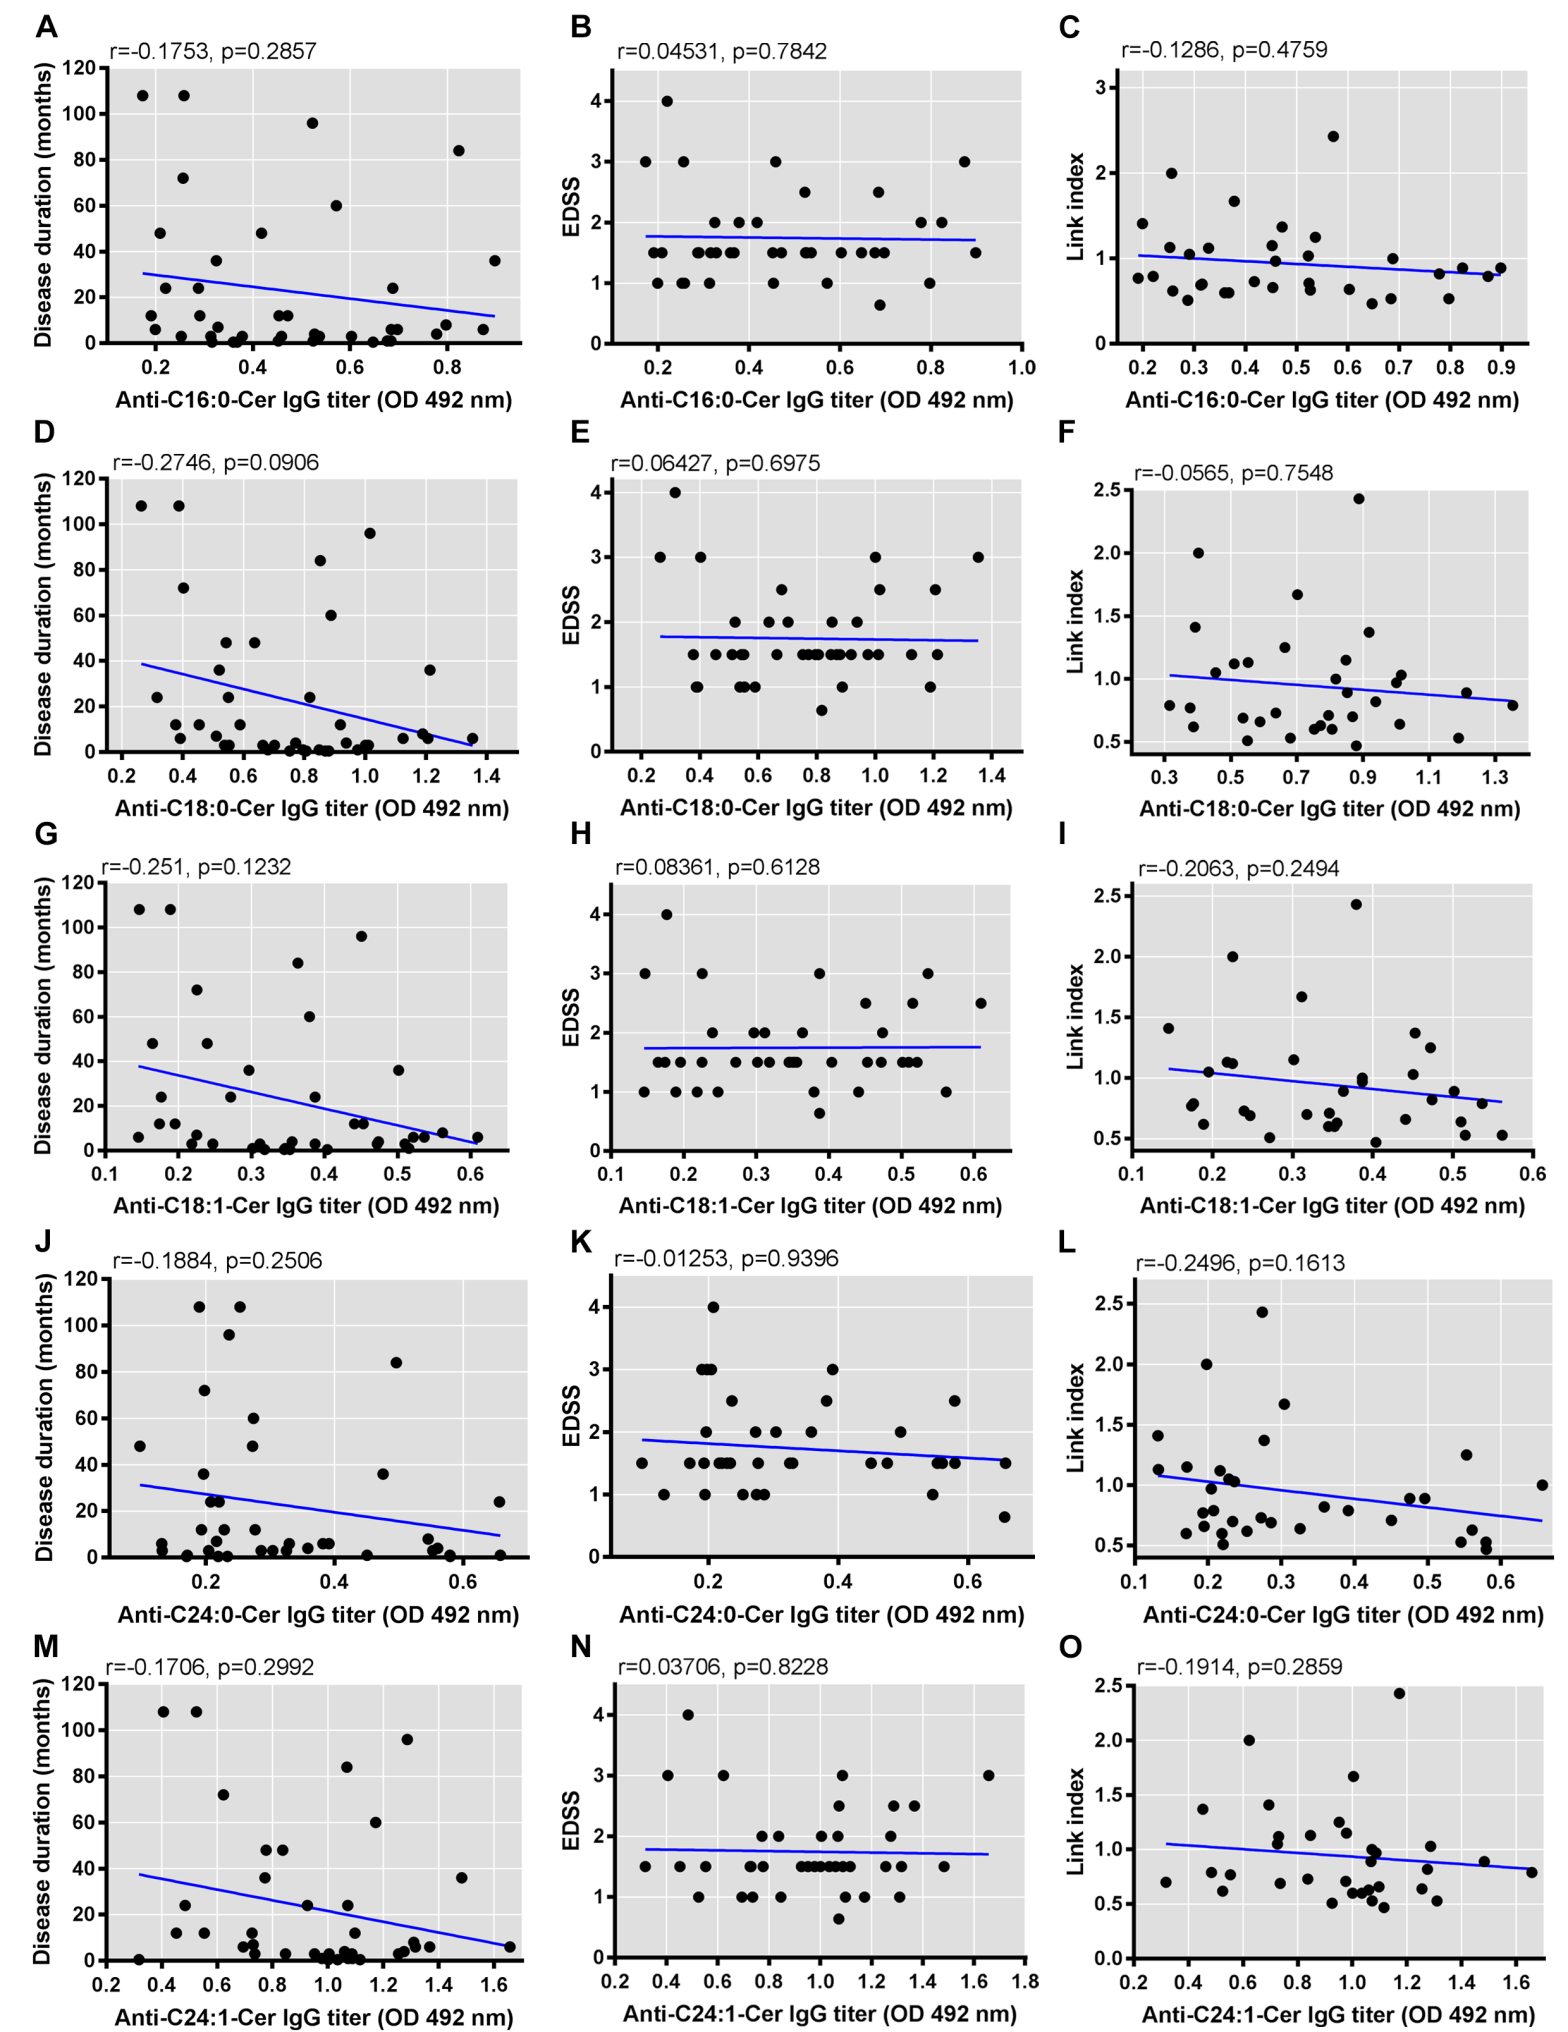


**Supplemental Fig. S7.** Correlation of serum anti-C16:0-C1P(panels **A-C**), anti-C18:0-C1P (panels **D-F**), anti-C18:1-C1P (panels **G-J**), anti-C24:0-C1P(panels **J-L**) andanti-C24:1-C1P(panels **M-O**) IgG derived from patients with RRMS with clinical parameters. Clinical variables included: disease duration (panels **A, D, G, J** and **M**), EDSS (panels **B, E, H, K** and **N)** and Link index (panels **C, F, I, L** and **O**). Statistical significance (p value) with appropriate Spearman’s correlation coefficient predictor (r value) was provided. Abbreviations: C1P- ceramide-1-phosphate; EDSS- Expanded Disability Status Scale; RRMS- relapsing-remitting multiple sclerosis.
